# Supplementary material for: Is Ultra-Processed Food Intake Associated with a Higher Risk of Glaucoma? A Prospective Cohort Study including 19,255 Participants from the SUN Project
Source: MDPI journal article supplement (doi:10.3390/nu16071053), 2024-04-04
Supplement: s1 [file s1]

**Table S1.** *Ad-hoc* ultra-processed foods classification in the SUN food frequency questionnaire.

| Group          | Included foods                                                                                                                                                                                    |
|----------------|---------------------------------------------------------------------------------------------------------------------------------------------------------------------------------------------------|
| Sausages       | Processed meat (chorizo, salami, mortadella, sausage, morcilla), ham, spicy sausage/meatballs, pâté, and foie-gras.                                                                               |
| Beverages      | Carbonated drinks, artificially sugared beverages, fruit drinks, alcoholic drinks produced by fermentation followed by distillation such as whisky, gin, and rum.                                 |
| Fried foods    | Potato chips, croquettes, and other fried foods.                                                                                                                                                  |
| Sweets         | Pre-prepared pies, breakfast cereals, cookies and chocolate cookies, doughnuts, muffins, croissants or other non-handmade pastries, cakes, churros, chocolates and candies, marzipan, and nougat. |
| Fast food      | Pizza, hamburger, instant soups and creams, and mayonnaise.                                                                                                                                       |
| Dairy products | Ice cream, custard, <i>petit-suisse</i> , flan, pudding, milkshakes, and margarine.                                                                                                               |
